# Supplementary material for: The Impact of the CBAHI Accreditation on Patient Outcomes: Evidence from Two Hospitals in Eastern Saudi Arabia
Source: Research Square preprint supplement (doi:10.21203/rs.3.rs-8076168/v1), 2025-12-30
Supplement: Supplementary file 1 [file 326bd9bf4ba35764b93dbf5a.pdf]

## Appendix 1: Questionnaire items

|                                                               |                                                                                                                                                                                                                                      |
|---------------------------------------------------------------|--------------------------------------------------------------------------------------------------------------------------------------------------------------------------------------------------------------------------------------|
| 1. Gender                                                     | <input type="checkbox"/> Male <input type="checkbox"/> Female                                                                                                                                                                        |
| 2. Age                                                        | <input type="checkbox"/> 18-29<br><input type="checkbox"/> 30-40<br><input type="checkbox"/> 41-50<br><input type="checkbox"/> 51-60<br><input type="checkbox"/> >60                                                                 |
| 3. Nationality                                                | <input type="checkbox"/> Saudi<br><input type="checkbox"/> Non-Saudi                                                                                                                                                                 |
| 4. Experience                                                 | <input type="checkbox"/> 1 year<br><input type="checkbox"/> 2–5 years<br><input type="checkbox"/> 6–10 years<br><input type="checkbox"/> More than 10 years                                                                          |
| 5. Qualification                                              | <input type="checkbox"/> High school<br><input type="checkbox"/> Diploma<br><input type="checkbox"/> Bachelor's degree<br><input type="checkbox"/> Postgraduate degree                                                               |
| 6. Profession                                                 | <input type="checkbox"/> Medical<br><input type="checkbox"/> Nursing<br><input type="checkbox"/> Leader<br><input type="checkbox"/> Other clinical<br><input type="checkbox"/> Supporting services<br><input type="checkbox"/> Other |
| 7. Working Unit                                               | <input type="checkbox"/> I work in multiple units<br><input type="checkbox"/> Patient care units<br><input type="checkbox"/> Management<br><input type="checkbox"/> Supporting services<br><input type="checkbox"/> Other            |
| 8. Have you been involved in accreditation process?           | <input type="checkbox"/> Yes <input type="checkbox"/> No                                                                                                                                                                             |
| 9. What is the type of hospital are you currently working in? | <input type="checkbox"/> Private<br><input type="checkbox"/> Government<br><input type="checkbox"/> Semi-government                                                                                                                  |
| 10. Do you have direct contact with patients?                 | <input type="checkbox"/> Yes <input type="checkbox"/> No                                                                                                                                                                             |

**Thinking about CBAHI accreditation, to what extent do you agree or disagree with the following statements:**

| Quality Result                                                                                                            | Strongly Disagree | Disagree | Neutral | Agree | Strongly Agree |
|---------------------------------------------------------------------------------------------------------------------------|-------------------|----------|---------|-------|----------------|
| 1. Over the past 3 years, the hospital has shown steady, measurable improvements in the quality of customer satisfaction. |                   |          |         |       |                |
| 2. ...administration (finance, human resources, etc.).                                                                    |                   |          |         |       |                |
| 3. ...care provided to patients.                                                                                          |                   |          |         |       |                |
| 4. ...clinical support departments.                                                                                       |                   |          |         |       |                |
| 5. ...high-quality services despite constraints.                                                                          |                   |          |         |       |                |

- What are the positive and negative aspects of CBAHI accreditation...?

---



---



---

- What are your perceptions towards the changes resulted after gaining CBAHI accreditation?

---



---

- What are the main challenges your hospital faced during preparation of CBAHI accreditation?

---



---
